# Supplementary material for: Stage Specific Expression Pattern of Alpha-Hemoglobin-Stabilizing-Protein (AHSP) Portrayed in Erythroblast Chronology
Source: MDPI journal article supplement (doi:10.3390/mps3030046), 2020-06-30
Supplement: s1 [file s1]

## Supplemental Figure 1

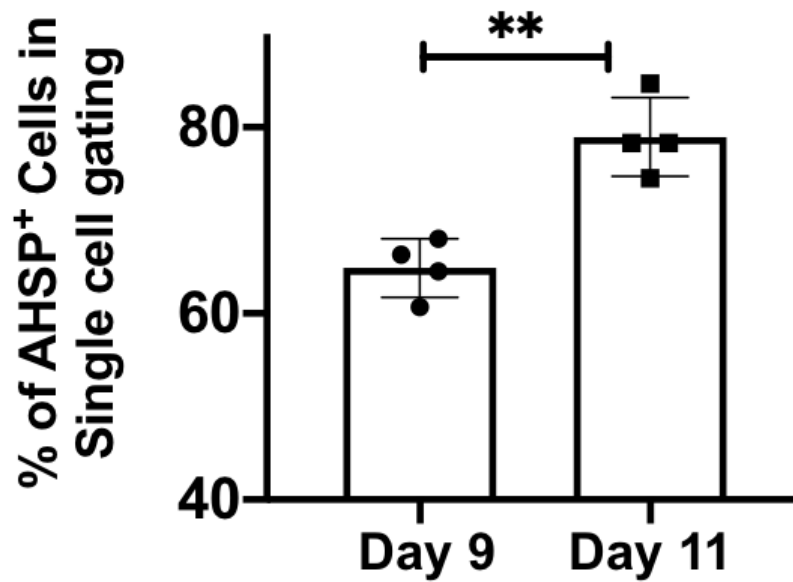

**Supplemental Figure S1.** Adult human donor bone marrow derived erythroblast cultures. Bar graphs represent Mean $\pm$ SEM of the percentage of AHSP<sup>+</sup> cells gated for single cells from Day 9 and Day 11 culture respectively ( $n = 4$ ).\*\*  $p < 0.002$  by unpaired two tailed  $t$  test with Welch's correction.

**Supplemental Figure 2**

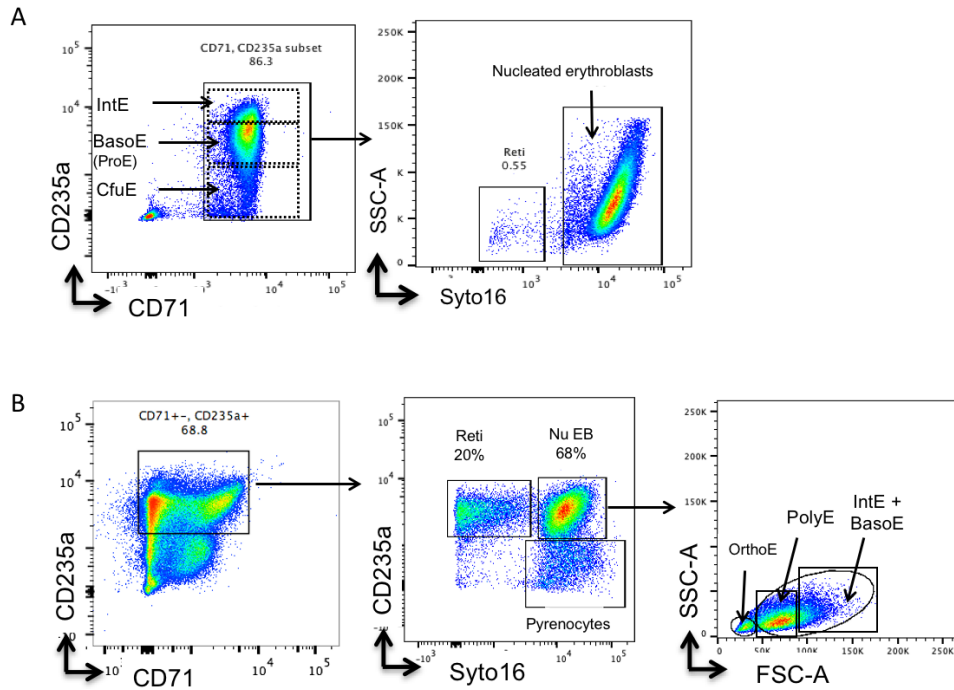

**Supplemental Figure S2.** Adult human donor bone marrow derived erythroblast cultures. **(A)** Day 9 cells gated out for live/dead, selected for single cells are viewed in scatter plots for CD71 in x-axis and CD235a in y-axis. Erythroblast subtypes with CD71<sup>hi</sup>CD235a<sup>neg</sup> are gated as Cfu-Es, those with CD71<sup>hi</sup>CD235a<sup>med</sup> are ProEs, and the ones expressing CD71<sup>hi</sup>CD235a<sup>hi</sup> are IntEs. **(B)** Day 11 cells gated out for live/dead, selected for single cells are viewed in scatter plots for CD71 in x-axis and CD235a in y-axis. CD71<sup>hi</sup>CD235a<sup>hi</sup> late erythroblasts are viewed in scatter plots for Syto16 (permeable nuclear dye) in x-axis and CD235a in y-axis. Those cells without the nucleus are reticulocytes (CD71<sup>hi</sup>CD235a<sup>hi</sup> Syto16<sup>neg</sup>). The nucleated erythroblasts (CD71<sup>hi</sup>CD235a<sup>hi</sup> Syto16<sup>pos</sup>) are stratified on the basis of size by plotting again on Forward and Side scatter. Representative gating for OrthoEs (SSC-A<sup>lo</sup>FSC-A<sup>lo</sup>, PolyEs (SSC-A<sup>med</sup>FSC-A<sup>med</sup>) and BasoEs + IntEs (SSC-A<sup>med</sup>FSC-A<sup>hi</sup>) are shown in the last panel.
